# Supplementary material for: Total photocatalysis conversion from cyclohexane to cyclohexanone by C3N4/Au nanocomposites
Source: Royal Society of Chemistry journal article supplement (doi:10.1039/c4gc01126k), 2014-07-21
Supplement: c4gc01126k1.pdf [file c4gc01126k1.pdf]

## Electronic Supplementary Information

### **Total Photocatalysis Conversion from Cyclohexane to Cyclohexanone by C<sub>3</sub>N<sub>4</sub>/Au Nanocomposites**

*Juan Liu, Yanmei Yang, Naiyun Liu, Yang Liu,\* Hui Huang and Zhenhui Kang\**

#### **Conduction band (CB) and valence band (VB) energy level calculation**

By subtracting the width of the He I UPS spectra (Fig. S5) from the excitation energy (21.22 eV), the ionization potential was calculated to be 6.35 eV. The  $E_v$  (at 6.35 eV) and  $E_c$  (conduction band energy, at 3.64 eV) of C<sub>3</sub>N<sub>4</sub>/Au can be converted to the electrochemical energy potential in volts (1.91 V and -0.80 V respectively) based on a reference standard where 0 V (equal to 4.44 eV when compared to the normal hydrogen electrode potential (NHE)) is plotted against  $E_{vac}$  (vacuum level).

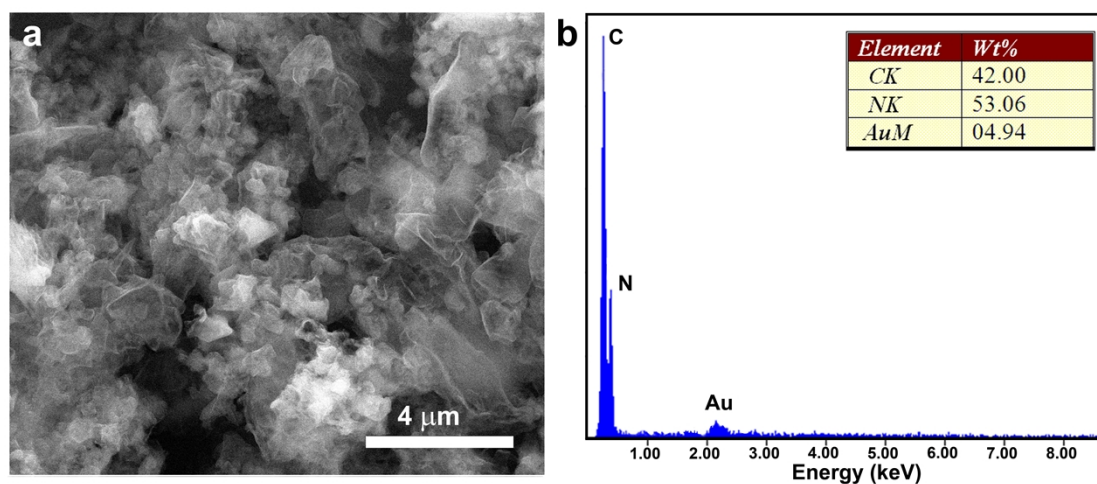

**Fig. S1** (a) SEM images of  $C_3N_4/Au$ . (b) EDX of  $C_3N_4/Au$ .

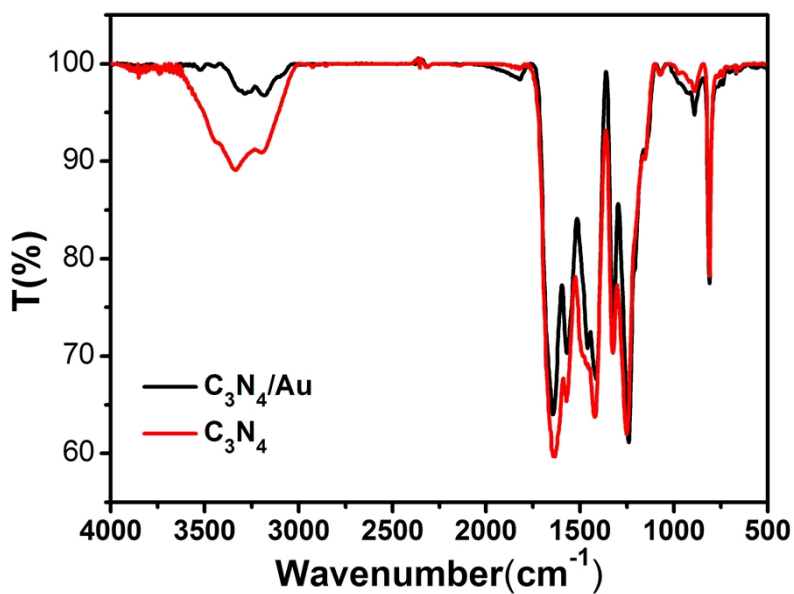

**Fig. S2** FT-IR spectra of the obtained graphitic carbon nitride powders ( $C_3N_4$  and CDots- $C_3N_4$ ). The spectra present several major bands between  $1200\text{ cm}^{-1}$  and  $1650\text{ cm}^{-1}$  region, which correspond to the characteristic stretching modes of CN heterocycles. In addition, the breathing mode of triazine units appears at  $809\text{ cm}^{-1}$ . The results are well consistent with former reports.

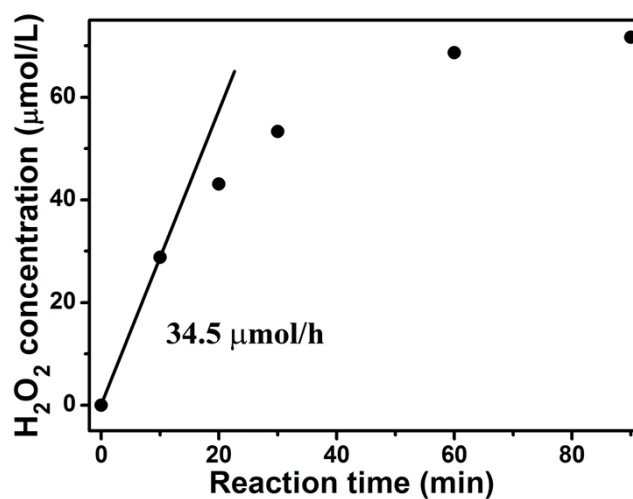

**Fig. S3** A time course of  $\text{H}_2\text{O}_2$  production from water under visible light (of wavelength longer than 420 nm) by pure  $\text{C}_3\text{N}_4$  for 90 min.

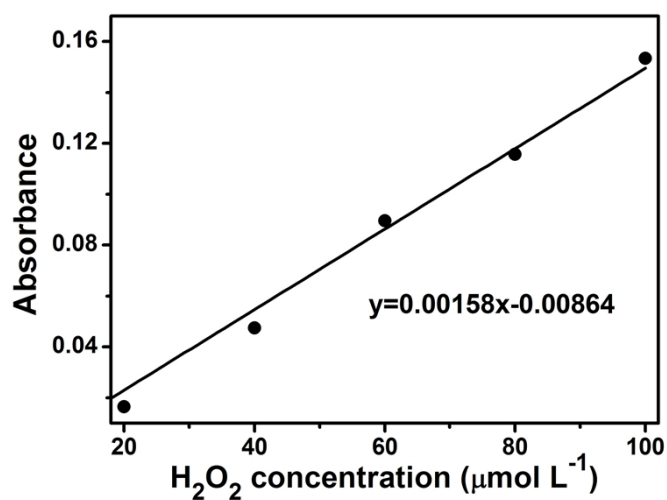

**Fig. S4** The calibration curve and the fitting equation of the  $\text{H}_2\text{O}_2$  concentration and absorbance, which are determined by external standard method using  $\text{H}_2\text{O}_2$  as standard materials with different concentration.

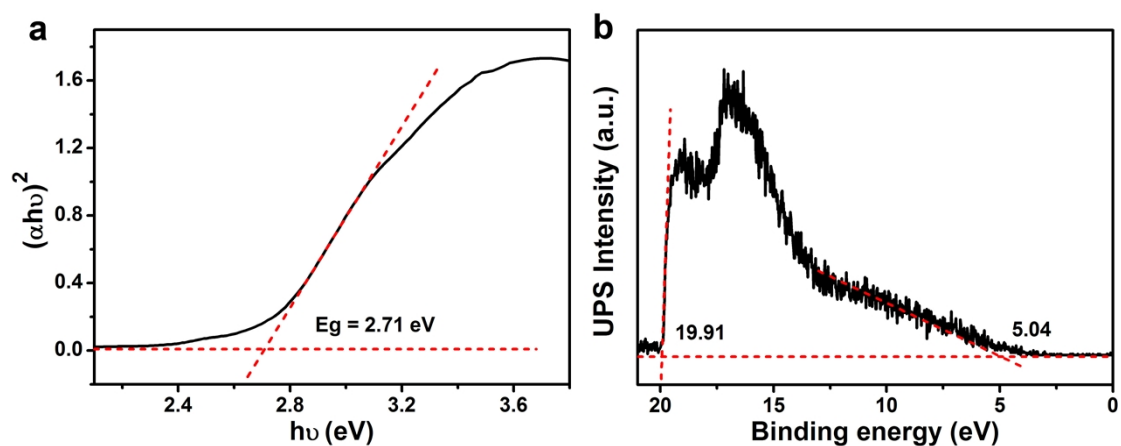

**Fig. S5** (a)  $(\alpha h\nu)^2$  vs.  $h\nu$  curve of  $C_3N_4/Au$ . (b) UPS spectra of  $C_3N_4/Au$ .

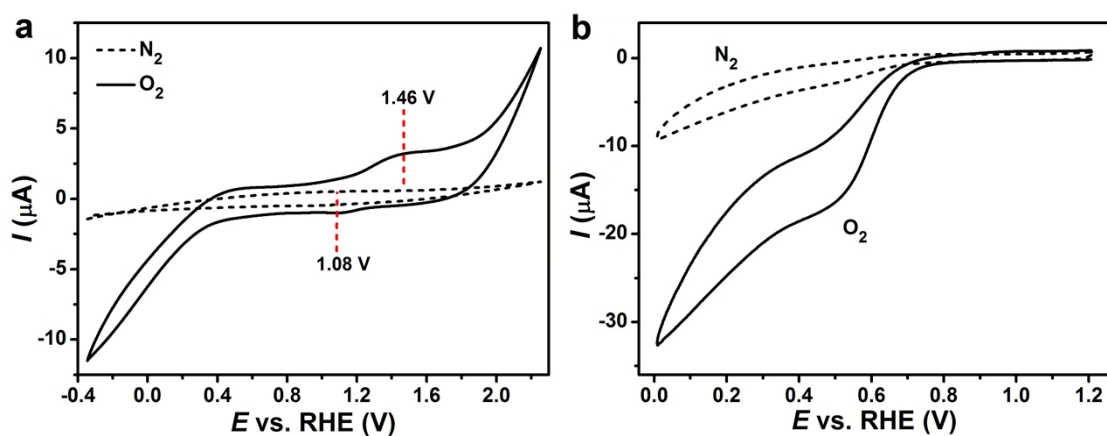

**Fig. S6** (a) Cyclic voltammograms (CV) of  $C_3N_4/Au$  modified GC electrodes in  $O_2$ -saturated (solid lines) and  $N_2$ -saturated (dash lines) ultrapure water and in at a scan rate of 50 mV/s. (b) CV curves of  $C_3N_4/Au$  modified GC electrodes in  $O_2$ -saturated (solid lines) and  $N_2$ -saturated (dash lines) 0.1 M KOH at a scan rate of 50 mV/s.
